# Supplementary figures and images for: Stereotyped behavioral maturation and rhythmic quiescence in C. elegans embryos
Source: eLife journal article supplement (doi:10.7554/elife.76836), 2022-08-05

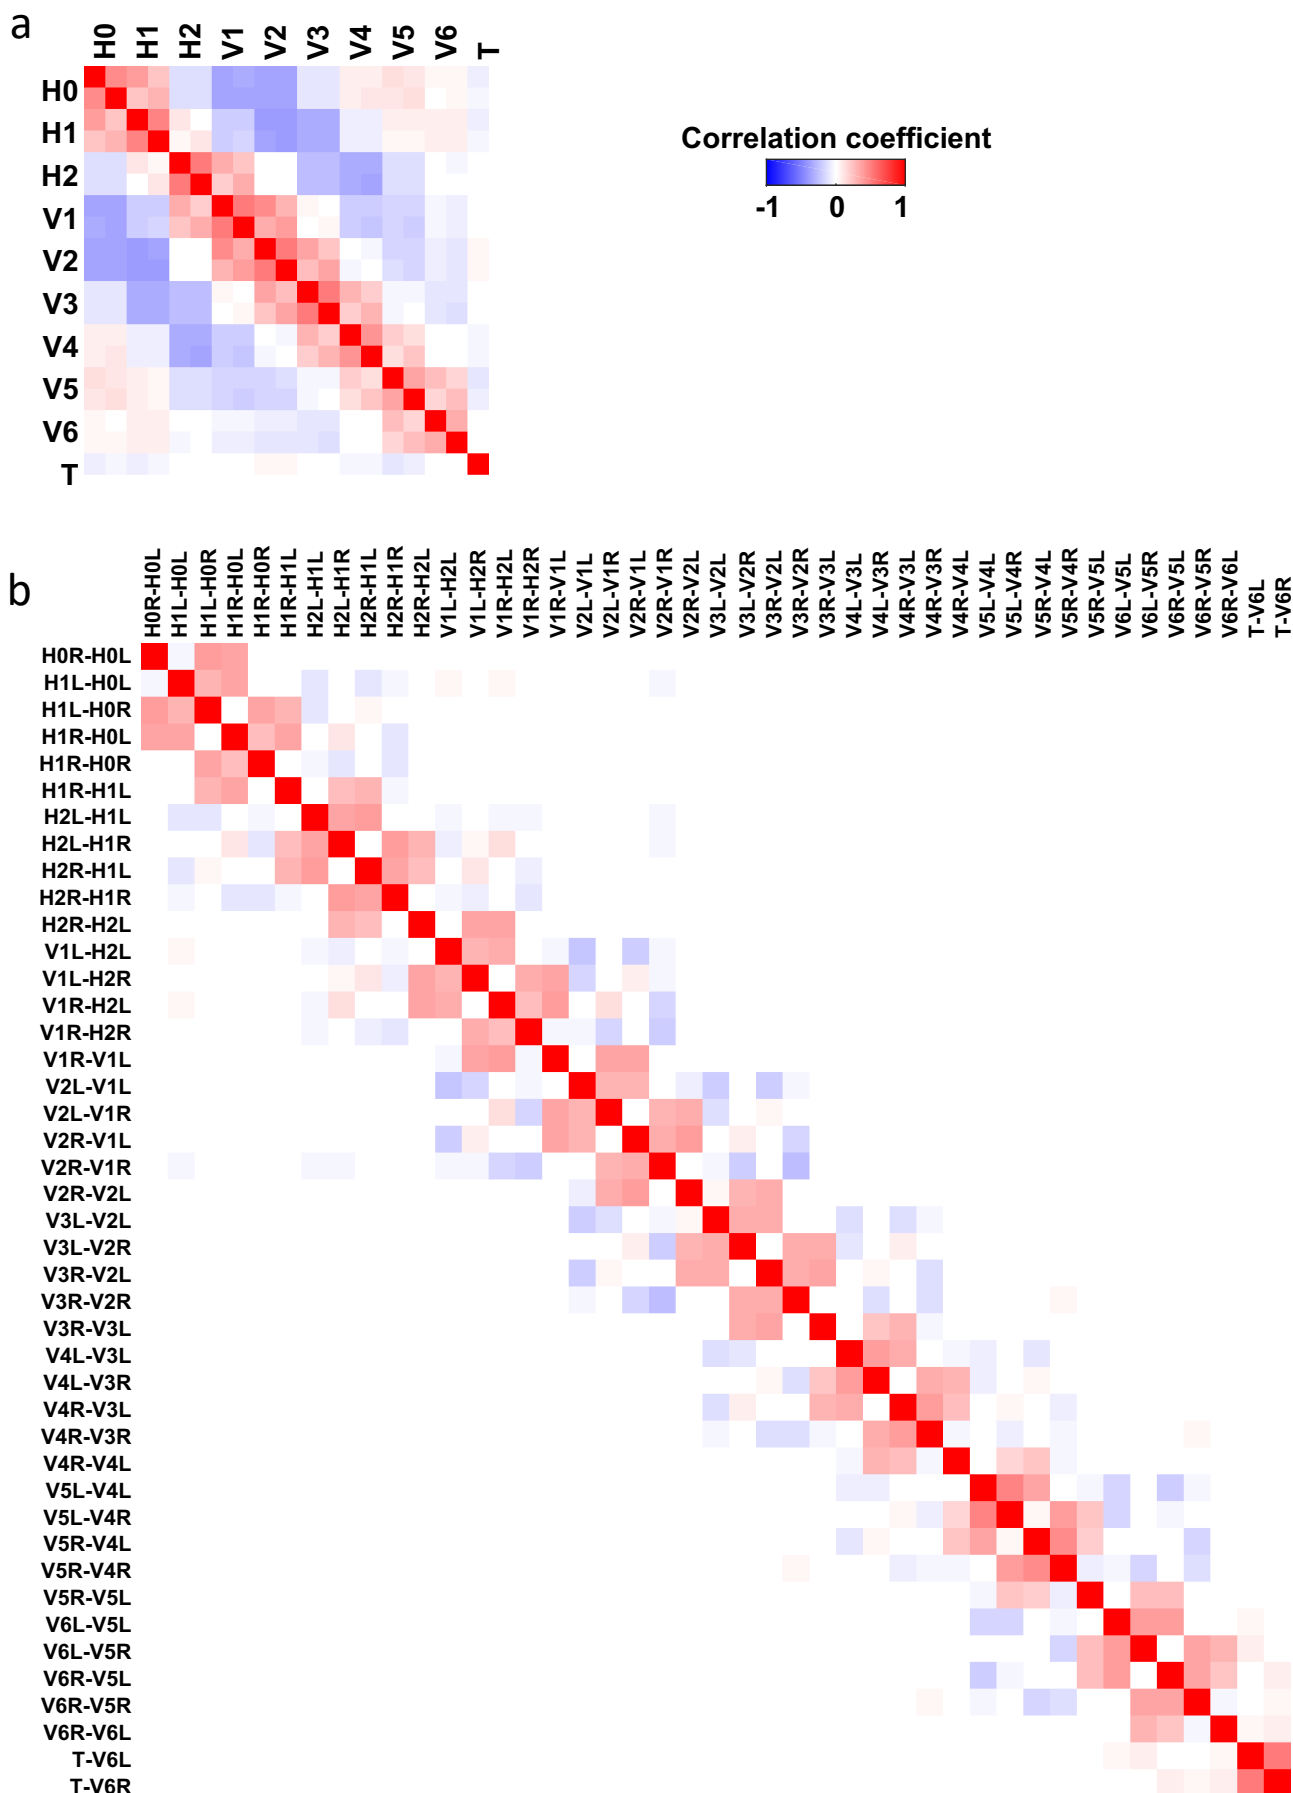

Fig. 1-Supp. 1

Supplement: supp [file elife_poa_e76836_Figure_1_figure_supplement_1.pdf › elife_poa_e76836_Figure_1_figure_supplement_1.pdf]

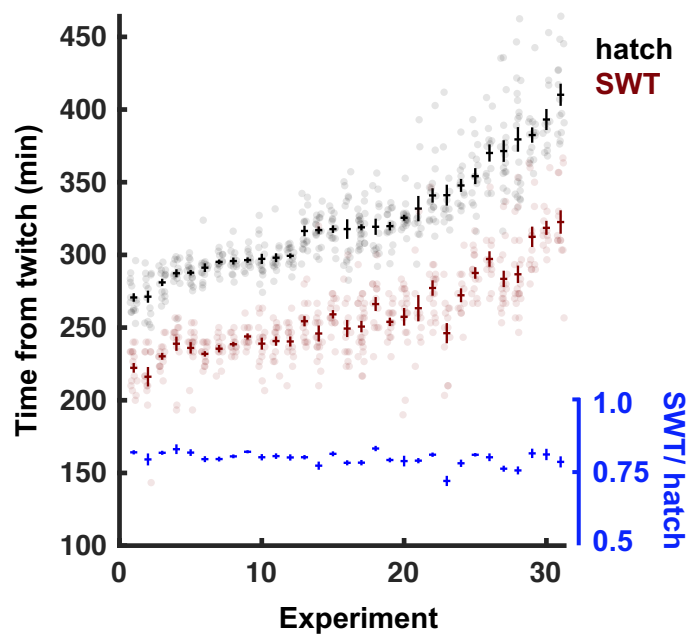

Fig. 3-Supp. 1

Supplement: supp [file elife_poa_e76836_Figure_3_figure_supplement_1.pdf › elife_poa_e76836_Figure_3_figure_supplement_1.pdf]

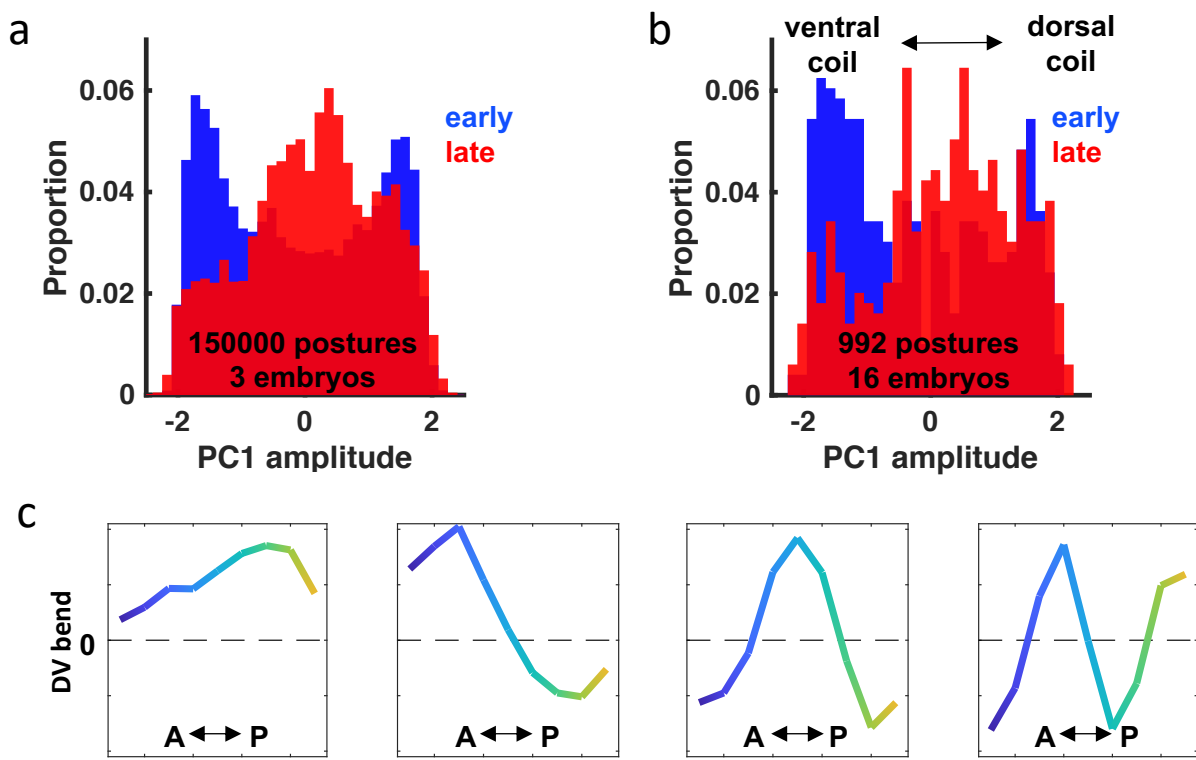

Fig. 4-Supp. 1

Supplement: supp [file elife_poa_e76836_Figure_4_figure_supplement_1.pdf › elife_poa_e76836_Figure_4_figure_supplement_1.pdf]

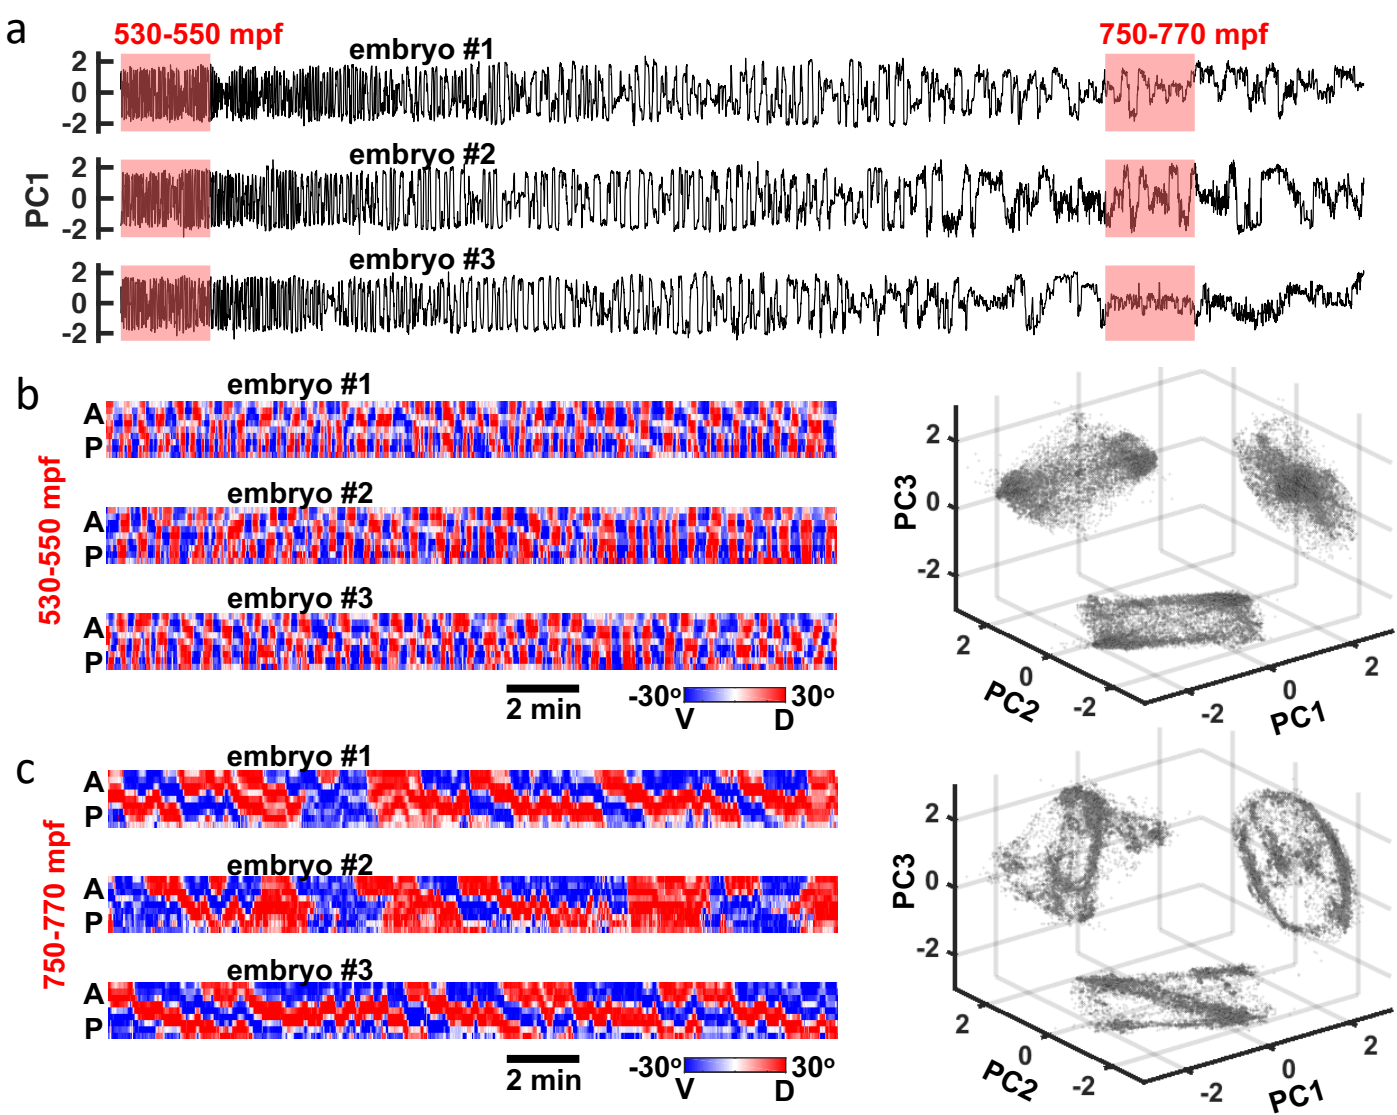

Fig. 4-Supp. 2

Supplement: supp [file elife_poa_e76836_Figure_4_figure_supplement_2.pdf › elife_poa_e76836_Figure_4_figure_supplement_2.pdf]

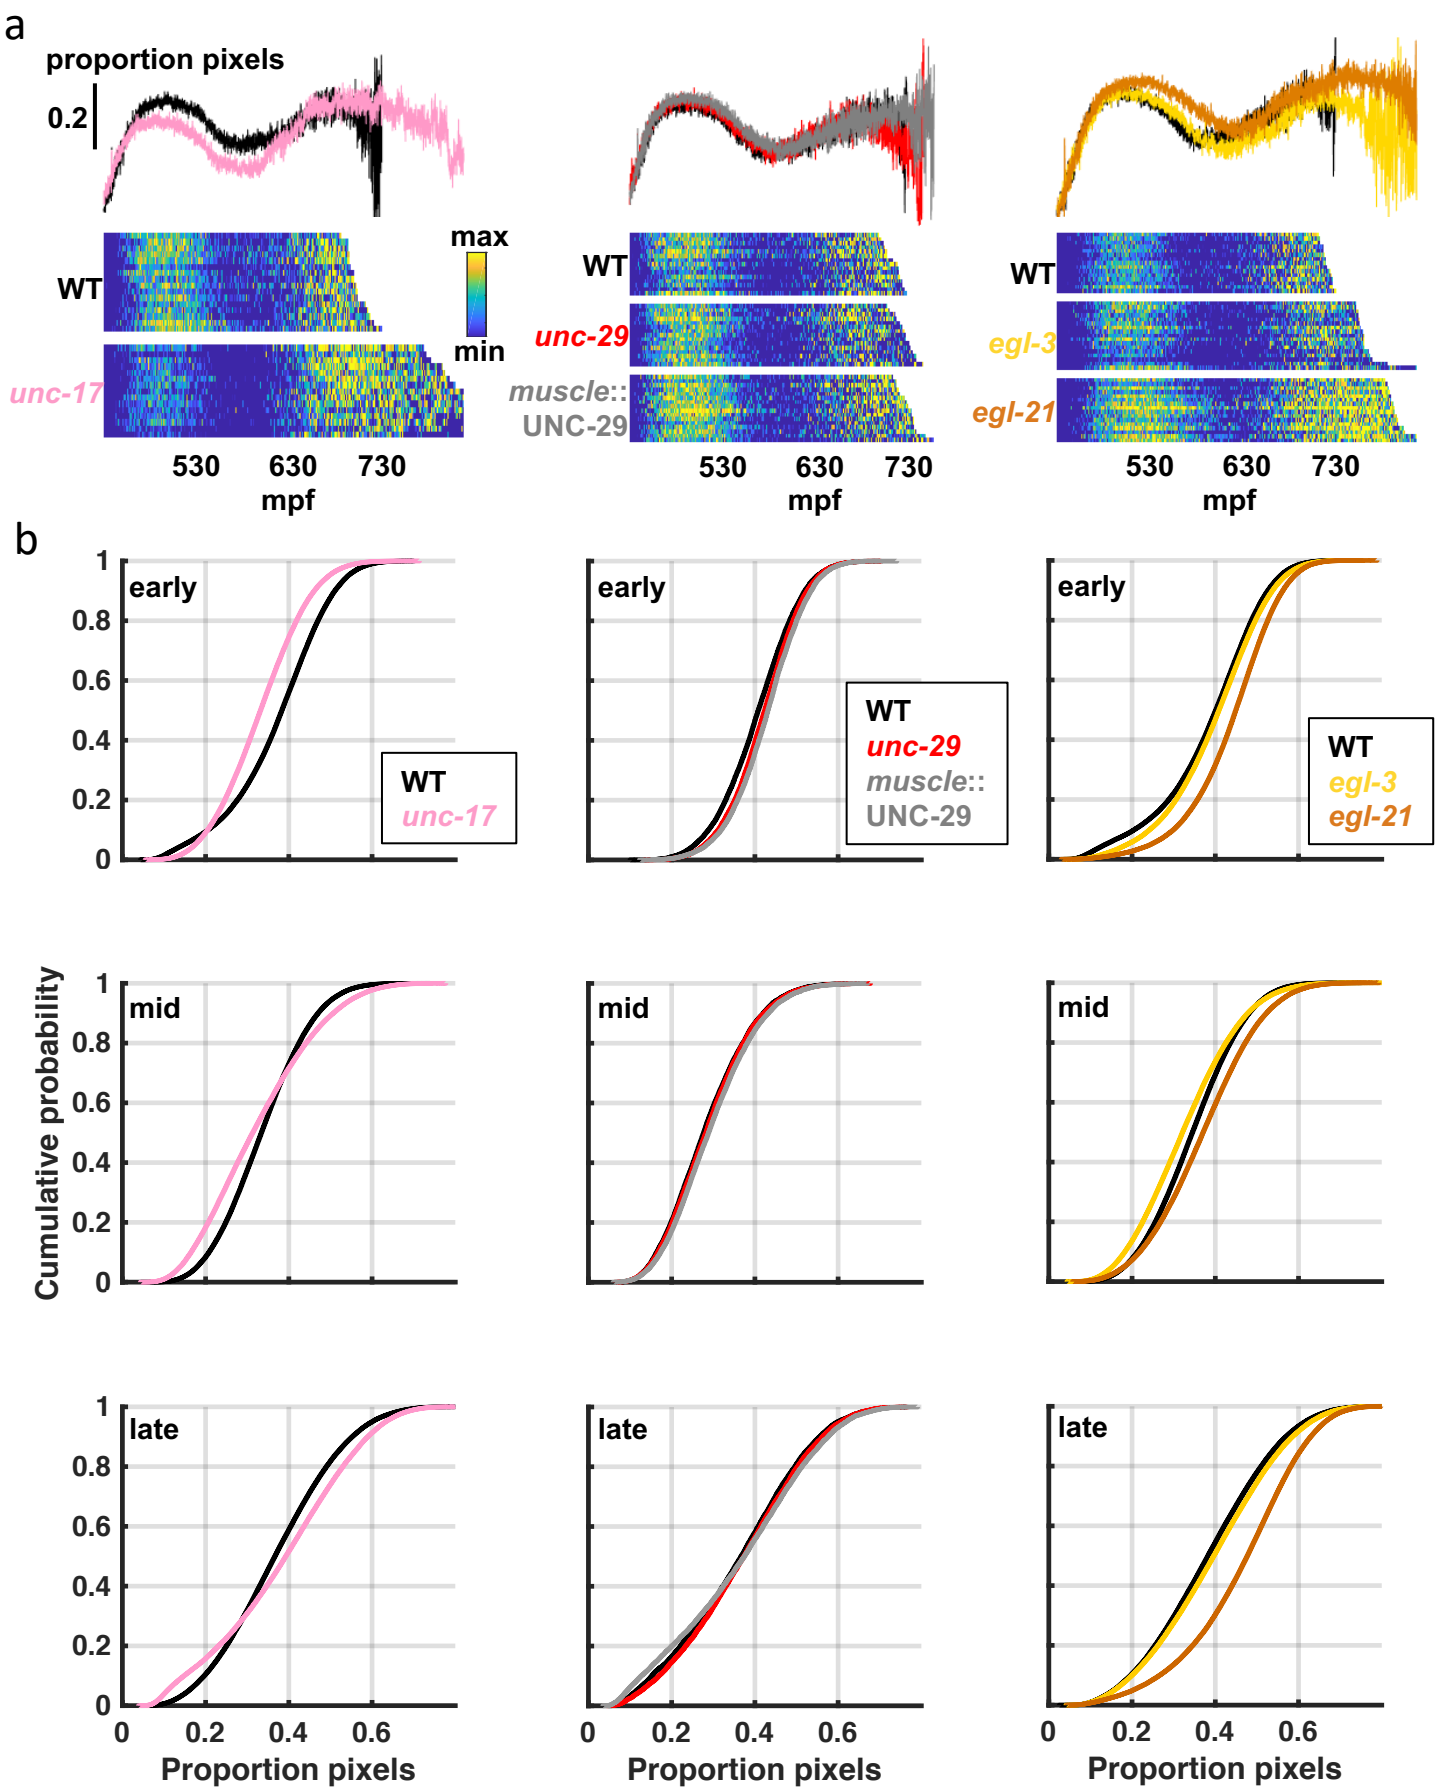

Fig. 6-Supp. 1

Supplement: supp [file elife_poa_e76836_Figure_6_figure_supplement_1.pdf › elife_poa_e76836_Figure_6_figure_supplement_1.pdf]

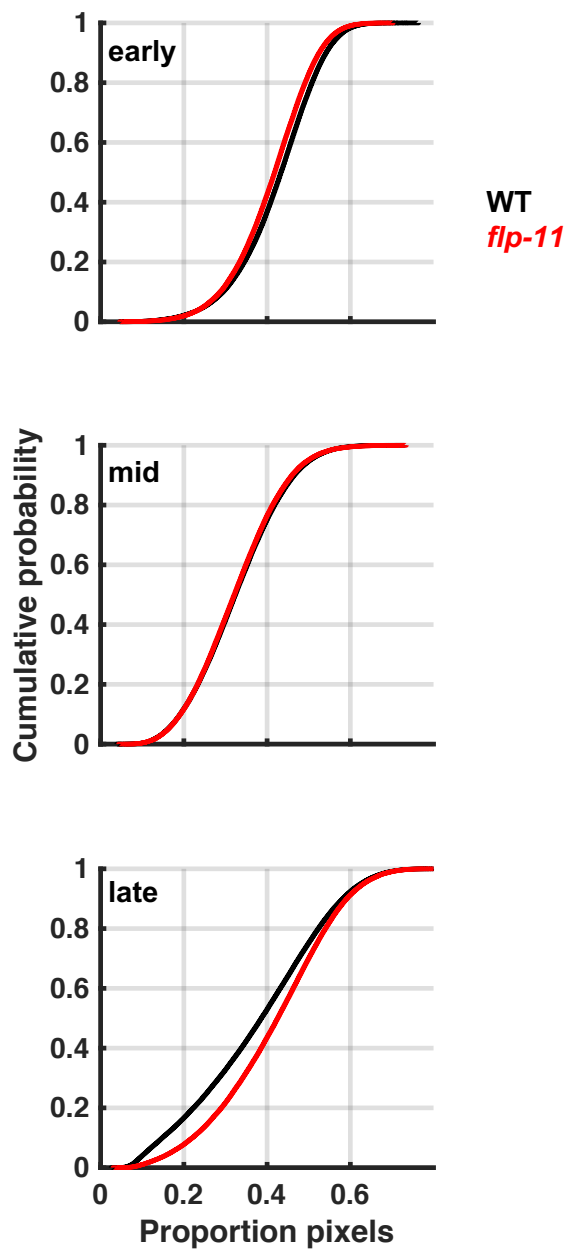

Fig. 7-Supp. 1

Supplement: supp [file elife_poa_e76836_Figure_7_figure_supplement_1.pdf › elife_poa_e76836_Figure_7_figure_supplement_1.pdf]

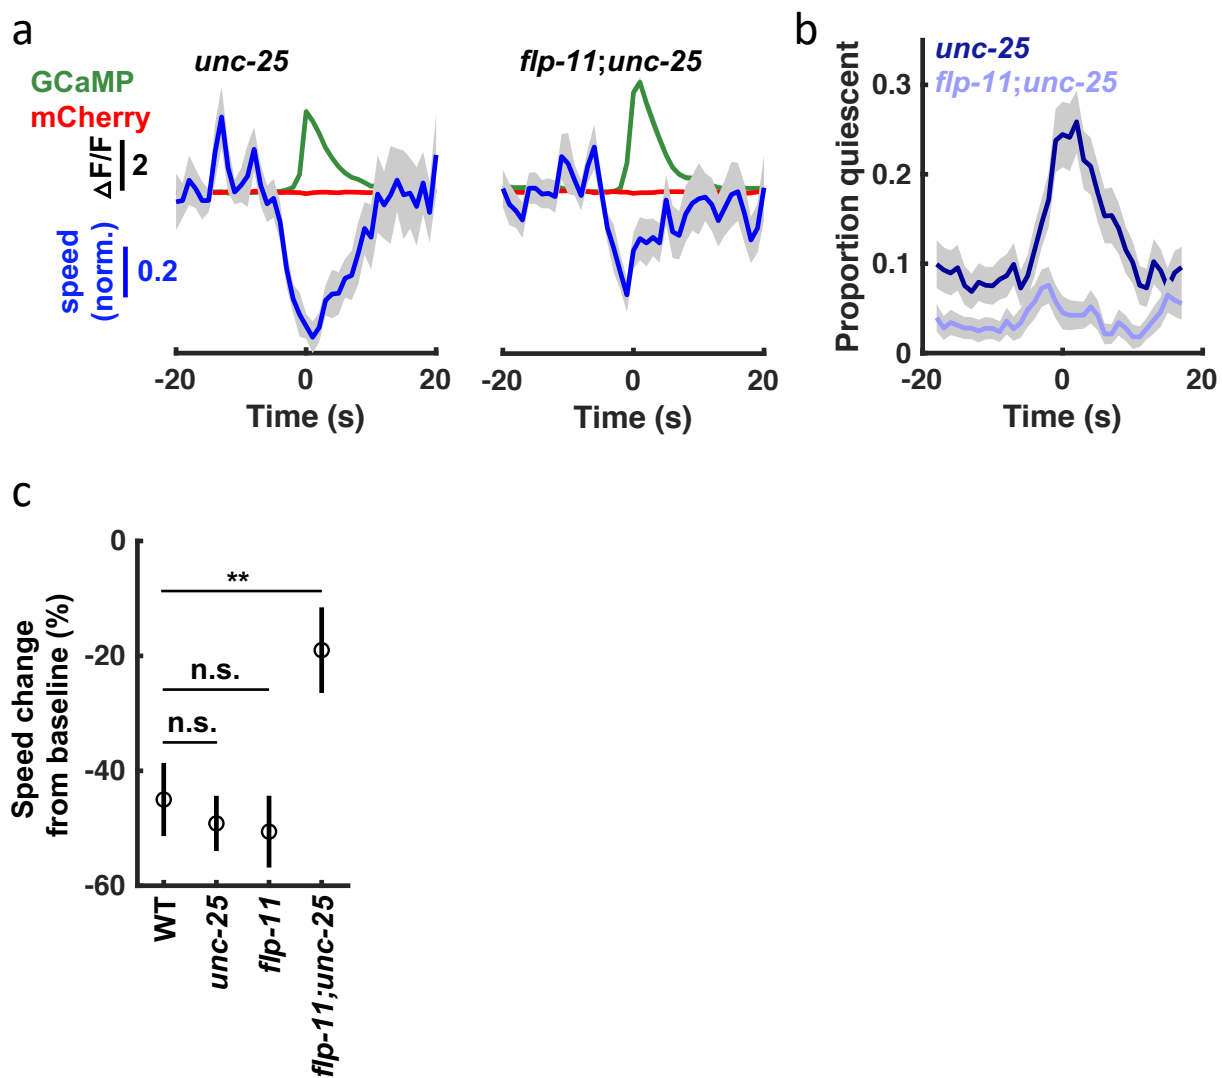

Fig. 8-Supp. 1

Supplement: supp [file elife_poa_e76836_Figure_8_figure_supplement_1.pdf › elife_poa_e76836_Figure_8_figure_supplement_1.pdf]

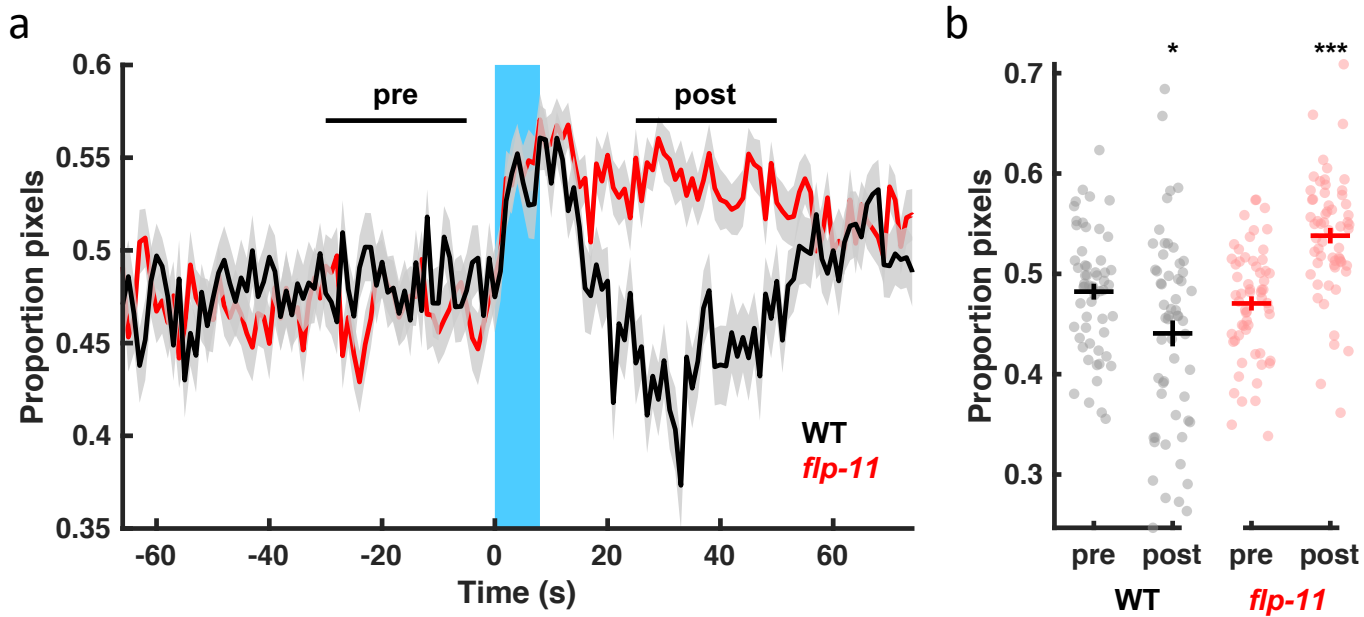

Fig. 9-Supp. 1

Supplement: supp [file elife_poa_e76836_Figure_9_figure_supplement_1.pdf › elife_poa_e76836_Figure_9_figure_supplement_1.pdf]
